# Supplementary material
Source: PubMed Central journal article supplement (PMC2669306)
Supplement: NIHMS94185-supplement-1_si_002.pdf [file NIHMS94185-supplement-1_si_002.pdf]

**Supporting Information for:**

**Dipolar Second-Order Nonlinear Optical Chromophores Containing Ferrocene, Octamethylferrocene, and Ruthenocene Donors and Strong  $\pi$ -Acceptors: Crystal Structures and Comparison of  $\pi$ -Donor Strengths**

Tiffany Kinnibrugh, Seyhan Salman, Yulia A. Getmanenko, Veaceslav Coropceanu, William W. Porter III, Tatiana V. Timofeeva, Adam J. Matzger, Jean-Luc Brédas, Seth R. Marder, and Stephen Barlow\*

|                                                           |          |
|-----------------------------------------------------------|----------|
| I. Table of Crystal and Refinement Parameters             | pS2-S3   |
| II. Atom Numbering for <b>1-6</b>                         | pS4-S5   |
| III. Polymer-Induced Heteronucleation Studies of <b>3</b> | pS6-S11  |
| IV. Crystal Packing for <b>1-6</b>                        | pS12-S14 |
| V. NMR Data for <b>1-6</b> and <b>IX</b>                  | pS15-S17 |
| VI. Calculated Atomic Charge Density Data                 | pS18-S23 |

## I. Table of Crystal and Refinement Parameters

**Table 1.** Selected Crystal and Refinement Parameters for the Crystal Structure Determinations.

|                                        | 1                       | 2                       | 3                       | 4                       | 5                       | 6                       |
|----------------------------------------|-------------------------|-------------------------|-------------------------|-------------------------|-------------------------|-------------------------|
| Formula                                | $C_{23}H_{24}FeN_2O_2S$ | $C_{31}H_{40}FeN_2O_2S$ | $C_{23}H_{24}N_2O_2RuS$ | $C_{26}H_{18}FeN_2O_2S$ | $C_{34}H_{34}FeN_2O_2S$ | $C_{26}H_{18}N_2O_2RuS$ |
| $M_r$                                  | 448.35                  | 560.56                  | 493.57                  | 478.33                  | 590.54                  | 523.55                  |
| crystal system                         | Triclinic               | Triclinic               | Triclinic               | Triclinic               | Triclinic               | Triclinic               |
| space group                            | $P\bar{1}$              | $P\bar{1}$              | $P\bar{1}$              | $P\bar{1}$              | $P\bar{1}$              | $P\bar{1}$              |
| $a / \text{\AA}$                       | 7.845(2)                | 13.203(3)               | 9.2218(10)              | 8.017(2)                | 8.772(4)                | 7.564(2)                |
| $b / \text{\AA}$                       | 10.258(3)               | 14.472(4)               | 10.2988(11)             | 10.346(3)               | 10.597(5)               | 9.982(3)                |
| $c / \text{\AA}$                       | 14.989(4)               | 14.620(4)               | 11.7624(13)             | 13.485(3)               | 16.285(8)               | 15.465(4)               |
| $\alpha / ^\circ$                      | 74.724(5)               | 85.665(7)               | 91.517(2)               | 93.608(4)               | 94.158(8)               | 83.976(3)               |
| $\beta / ^\circ$                       | 85.733(5)               | 85.200(7)               | 96.695(2)               | 100.840(4)              | 95.374(7)               | 77.154(3)               |
| $\gamma / ^\circ$                      | 77.220(5)               | 82.663(6)               | 110.652(2)              | 106.161(4)              | 99.974(7)               | 74.250(3)               |
| $V / \text{\AA}^3$                     | 1134.6(5)               | 2754.9(13)              | 1035.45(19)             | 1047.2(5)               | 1478.3(12)              | 1094.6(5)               |
| $Z$                                    | 2                       | 4                       | 2                       | 2                       | 2                       | 2                       |
| $\rho_{\text{calc}} / \text{gcm}^{-3}$ | 1.312                   | 1.352                   | 1.583                   | 1.517                   | 1.327                   | 1.589                   |

|                                 |                |                |                |                |                |                |
|---------------------------------|----------------|----------------|----------------|----------------|----------------|----------------|
| $\mu / \text{mm}^{-1}$          | 0.777          | 0.654          | 0.880          | 0.847          | 0.614          | 0.838          |
| $F(000)$                        | 468            | 1192           | 504            | 492            | 620            | 528            |
| Crystal size / $\text{mm}^3$    | 0.30×0.10×0.03 | 0.36×0.35×0.15 | 0.29×0.10×0.06 | 0.04×0.04×0.03 | 0.05×0.04×0.03 | 0.20×0.17×0.09 |
| $2\theta_{\text{max}} / ^\circ$ | 59.0           | 52.0           | 59.0           | 60.0           | 59.0           | 59.0           |
| reflections collected           | 19209          | 15852          | 12077          | 15996          | 16461          | 13254          |
| unique reflections              | 6298           | 10828          | 5685           | 6044           | 8149           | 6027           |
| $R_{\text{int}}$                | 0.0437         | a              | 0.0431         | 0.0605         | 0.0874         | 0.0492         |
| used reflections                | 6298           | 10828          | 5685           | 6044           | 8149           | 6027           |
| reflns with $I > 2\sigma(I)$    | 4821           | 6786           | 4763           | 3624           | 3776           | 4403           |
| no. of parameters               | 264            | 687            | 262            | 289            | 369            | 289            |
| $wR_2$                          | 0.0597         | 0.1041         | 0.0345         | 0.0580         | 0.1079         | 0.1081         |
| $R_1 [I > 2\sigma(I)]$          | 0.0323         | 0.0594         | 0.0833         | 0.0448         | 0.0642         | 0.0480         |
| $S$                             | 1.007          | 0.998          | 1.002          | 1.000          | 1.003          | 1.023          |

<sup>a</sup>Reflections were merged in TWINABS.

## II. Atom Numbering for Structures of 1-6

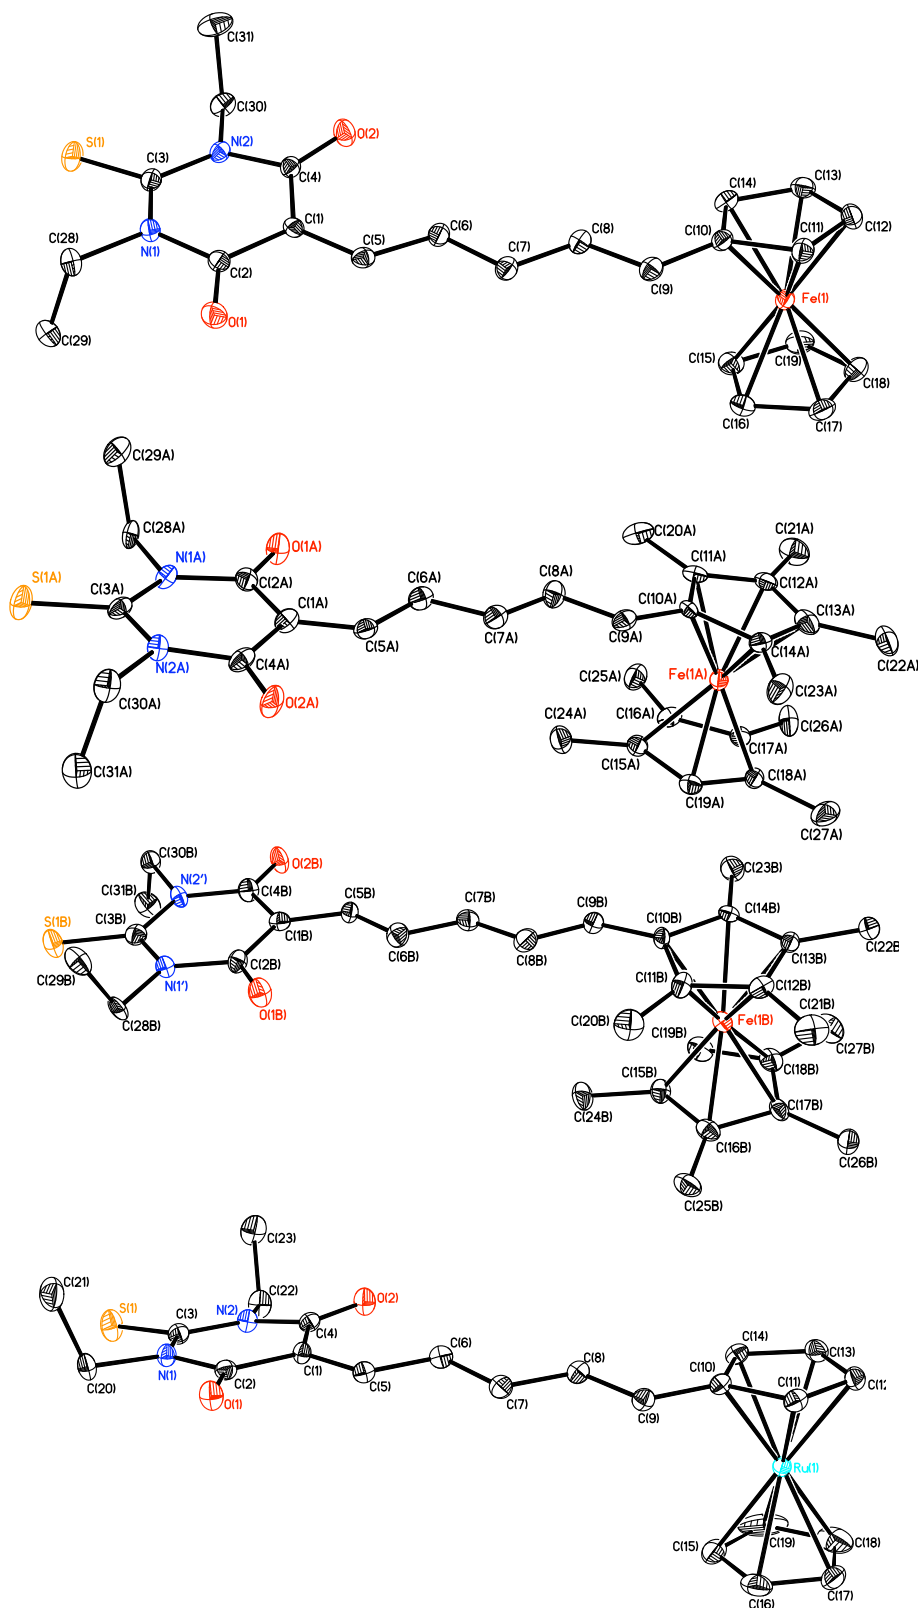

**Figure S1.** Atom labeling for TB chromophores; from top to bottom, **1**, **2A**, **2B**, **3**.

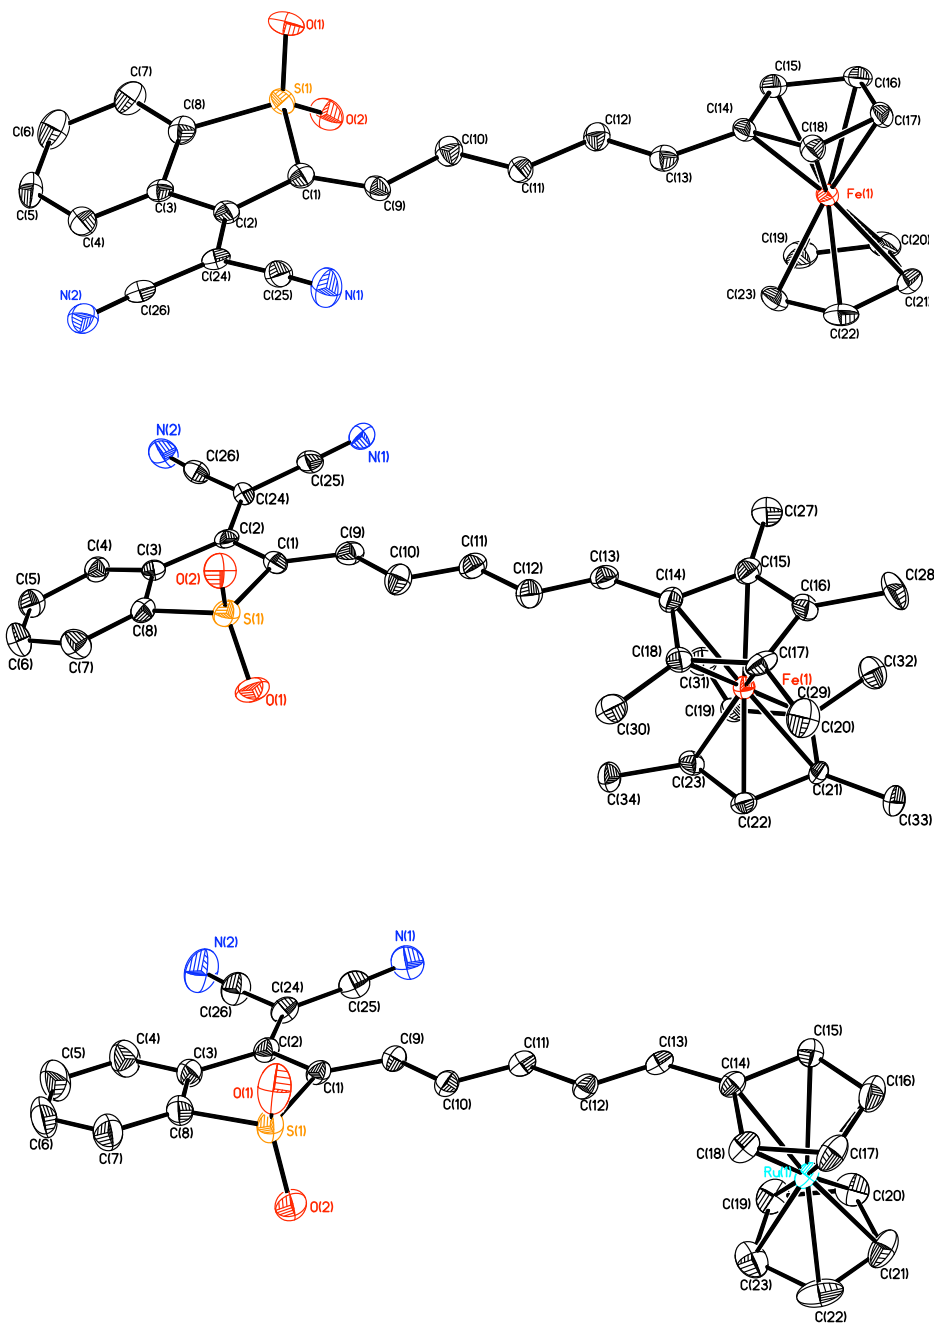

**Figure S2.** Atom labeling for SDS chromophores; from top to bottom, 4, 5, 6.

## II. Polymer-Induced Heteronucleation Studies of **3**

As discussed in the main text, crystals obtained from **1-6** were all centrosymmetric. Nonetheless, many compounds are known to crystallize in multiple arrangements, that is, to exhibit polymorphism, leaving open the possibility that alternative NLO-active non-centrosymmetric polymorphs might be obtained under different conditions. We chose **3** as a system for further investigation due to the fact that the X-ray quality crystals of **3** used for structure determination (recrystallized from ethyl acetate) exhibit different morphologies from the microcrystalline material obtained from the synthesis (which crystallizes from the hot ethanolic reaction mixture). To further investigate the possibility of growing non-centric crystals, polymer-induced heteronucleation<sup>1,2</sup> (PIHn) was employed to screen for polymorphs of **3**. This method exploits the ability of the surface of an insoluble material to direct crystallizing phase formation through heteronucleation processes.

PIHn studies of **3** were carried out using three cross-linked polymer libraries – one containing polymers with non-polar and aromatic functional groups, one containing nitrogen-rich functional groups, and the final library containing acidic functional groups – the components of which were as follows. Non-polar/aromatic library: 4-acetoxystyrene (AOS), *n*-butyl methacrylate (*n*-BuMA), *tert*-butyl methacrylate (*t*-BuMA), benzyl methacrylate (BzMA), methyl methacrylate (MMA), and styrene (STY) with divinylbenzene (DVB). Polar/Nitrogen library: 2-dimethylaminoethyl methacrylate (DMAEMA), *N,N*-dimethylmethacrylamide (DMMAA), methacrylonitrile (MAN), 2-methyl-2-nitropropylmethacrylate (MNPMA), 2-vinylpyridine (2VP), 4-vinylpyridine (4VP). Polar/Acidic library: acrylic acid (AA), 2-ethoxyethyl methacrylate (EEMA), ethylene glycol methacrylate phosphate (EGMAP), 2-hydroxyethyl methacrylate

---

1. Lang, M. D.; Grzesiak, A. L.; Matzger, A. J., *J. Am. Chem. Soc.* **2002**, *124*, 14834.

2. Price, C. P.; Grzesiak, A. L.; Matzger, A. J., *J. Am. Chem. Soc.* **2005**, *127*, 5512.

(HEMA), methacrylic acid (MAA), and methyl methacrylate (MMA) with DVB. Libraries were synthesized in 96-well plates by a previously published procedure.<sup>2</sup> Briefly, six 1:1 (v/v) monomer solutions in ethanol were dispensed as 90 pairwise combinations of varied ratios (43:7, 36:14, 29:21, 21:29, 14:36, and 7:43) and six pure monomer solutions by a Gilson 215 liquid handler to a volume of 100  $\mu$  L. To each of these 96 solutions was added 50  $\mu$ L of a 1:1 (v/v) solution of DVB in ethanol containing 2 mol% 2,2'-azobisisobutyronitrile with respect to DVB. The solutions were photopolymerized in a nitrogen atmosphere and then annealed at 80 °C under vacuum to produce cross-linked polymer libraries.

Solutions of **3** in acetone (1.9 mM) were allowed to evaporate in the presence of the three polymer libraries described above. Optical microscopy and Raman spectroscopy were performed *in situ* and crystals were removed from the polymers with a cryoloop for powder X-ray diffraction. Raman spectra were obtained using a Renishaw inVia Raman Microscope equipped with a Leica microscope, RenCam CCD detector, 785 nm laser, 1200 lines/mm grating, and 50  $\mu$ m slit. Spectra were collected in extended scan mode in the range of 1800-100  $\text{cm}^{-1}$  at 0.5 % laser power and analyzed using the WiRE 2.0 software package. Calibration was performed using a silicon standard. Powder X-ray diffraction patterns were collected at ambient temperature using a Rigaku R-Axis SPIDER diffractometer with an imaging plate detector using graphite monochromated Cu-K $\alpha$  radiation (1.5406 Å). Samples were mounted on a cryoloop. To obtain powder patterns with minimized preferred orientation, images were collected for 5 minutes while rotating the sample about the  $\phi$ -axis at 10°·s<sup>-1</sup> while oscillating  $\omega$  between 120° and 180° at 1°·s<sup>-1</sup> with  $\chi$  set at 45°. Images were integrated from 2.5° to 50° 2 $\theta$  with a 0.05° step size with the AreaMax<sup>3</sup> software package. Powder patterns were processed in Jade Plus<sup>4</sup>

---

3. *AreaMax*, 2.0.0.4, Rigaku: Tokyo, 2005.

to calculate peak positions and intensities. SHG measurements were conducted on each form with a 1064 nm laser.

The crystals obtained were analyzed by Raman spectroscopy (Figure S3, Table S2) which indicated the presence of three distinct forms; differences in the vibrational modes in the 1500–1600  $\text{cm}^{-1}$  range and the 600–700  $\text{cm}^{-1}$  range are particularly diagnostic. The forms identified by Raman spectroscopy were confirmed to be distinct forms via powder X-ray diffraction (Figure S4, Table S3). The diffraction patterns shown in Figure S4 indicate that Form I corresponds to the structurally characterized form, Form II corresponds to that obtained in the synthesis, and Form III is unique. However, none of the three forms produced a second harmonic generation signal (using incident light of wavelength 1064 nm) suggesting that none of these forms is non-centrosymmetric. Terpolymers made from the monomers DMAEMA, MNPMA, and DVB and EGMAP, HEMA, and DVB produced crystals of Form I. Terpolymers made from AOS, *n*-BuMA, and DVB produced crystals of Form II. Terpolymers made from HEMA, MAA, and DVB and MAN, 2VP, and DVB produced crystals of Form III.

---

4. *Jade Plus 8.0, 8.2*, Materials Data, Inc: Livermore, CA, 1995-2007.



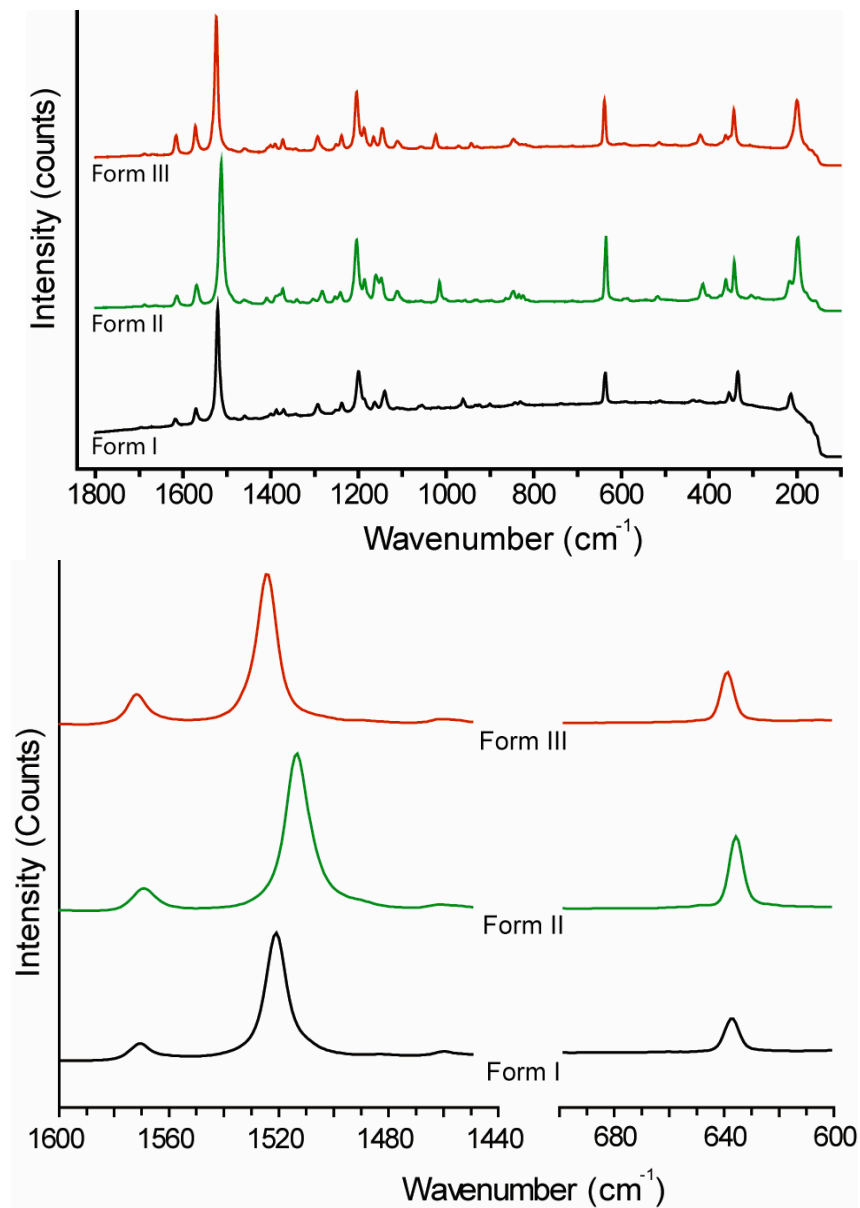

**Figure S3.** Raman spectra for the three forms of **3** showing (top) the full range examined and (below) the diagnostic regions.

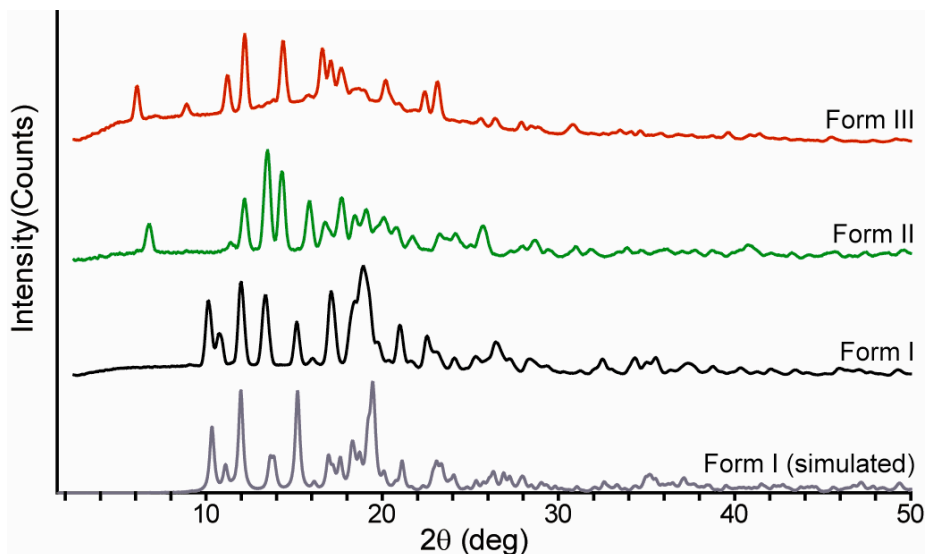

**Figure S4.** Powder X-ray diffraction pattern of **3** simulated from the single crystal structure and experimental patterns of the three forms obtained utilizing PIHn.

**Table S2.** Frequencies of Raman Vibrational Modes ( $\text{cm}^{-1}$ ) of the Three Forms of **3**.

| Form I |        | Form II |        | Form III |        |
|--------|--------|---------|--------|----------|--------|
| 1696.2 | 1061.5 | 1687.5  | 1015.2 | 1687.5   | 1111.5 |
| 1670.2 | 1054.7 | 1664.4  | 1001.7 | 1668.3   | 1057.6 |
| 1617.2 | 961.3  | 1614.3  | 971.9  | 1616.3   | 1050.9 |
| 1571.0 | 933.4  | 1569.1  | 957.4  | 1571.9   | 1023.9 |
| 1520.9 | 924.7  | 1513.2  | 929.5  | 1524.7   | 971.9  |
| 1460.2 | 900.6  | 1461.2  | 864.0  | 1461.2   | 943.0  |
| 1400.5 | 842.8  | 1410.1  | 846.7  | 1454.4   | 929.5  |
| 1387.0 | 831.3  | 1387.0  | 834.1  | 1407.2   | 846.7  |
| 1370.6 | 738.8  | 1380.3  | 824.5  | 1400.5   | 828.4  |
| 1343.7 | 636.7  | 1372.6  | 635.7  | 1389.9   | 818.7  |
| 1292.6 | 591.4  | 1340.8  | 593.4  | 1372.6   | 810.1  |
| 1251.2 | 512.4  | 1303.2  | 586.6  | 1343.7   | 638.6  |
| 1237.7 | 436.4  | 1282.0  | 518.2  | 1293.6   | 593.4  |
| 1199.2 | 420.9  | 1253.1  | 414.2  | 1250.2   | 514.4  |
| 1187.6 | 375.7  | 1241.6  | 402.6  | 1238.7   | 420.0  |
| 1162.6 | 354.5  | 1204.0  | 362.2  | 1204.0   | 362.2  |
| 1140.4 | 334.3  | 1185.7  | 342.9  | 1187.6   | 343.9  |
| 1111.5 | 213.9  | 1160.7  | 303.4  | 1165.5   | 199.4  |
| 1101.9 |        | 1148.1  | 289.0  | 1145.3   |        |
|        |        | 1111.5  | 216.7  |          |        |
|        |        |         | 197.5  |          |        |

**Table S3. Experimental Powder X-ray Diffraction Peak Positions ( $^{\circ}$ ) and Relative Peak Intensities for the Three Forms of 3.**

| Form I    |         | Form II   |         | Form III  |         |
|-----------|---------|-----------|---------|-----------|---------|
| $2\theta$ | $I/I_0$ | $2\theta$ | $I/I_0$ | $2\theta$ | $I/I_0$ |
| 10.2      | 66.6    | 6.8       | 32.2    | 6.1       | 40.9    |
| 10.7      | 32.1    | 11.4      | 15.8    | 7.1       | 3.0     |
| 12.0      | 85.8    | 12.2      | 55.4    | 8.9       | 15.6    |
| 13.4      | 72.8    | 13.5      | 100.0   | 11.2      | 48.0    |
| 15.2      | 43.8    | 14.3      | 80.3    | 12.2      | 100.0   |
| 16.1      | 5.2     | 15.9      | 53.3    | 13.8      | 5.5     |
| 17.1      | 74.6    | 16.8      | 34.3    | 14.4      | 85.0    |
| 18.4      | 62.1    | 17.7      | 56.5    | 15.8      | 9.7     |
| 18.9      | 100.0   | 18.5      | 40.4    | 16.6      | 73.6    |
| 21.0      | 43.1    | 19.1      | 45.9    | 17.0      | 57.3    |
| 21.6      | 5.4     | 20.1      | 38.6    | 17.7      | 47.0    |
| 22.6      | 31.7    | 20.8      | 29.3    | 18.7      | 18.5    |
| 23.0      | 15.7    | 21.7      | 21.3    | 20.2      | 38.0    |
| 24.1      | 10.2    | 23.3      | 23.5    | 21.0      | 9.2     |
| 25.4      | 12.6    | 24.2      | 23.9    | 22.4      | 33.9    |
| 26.5      | 27.8    | 25.7      | 30.6    | 23.1      | 51.8    |
| 27.3      | 12.1    | 27.2      | 8.1     | 25.6      | 9.9     |
| 28.4      | 11.8    | 28.0      | 12.4    | 26.4      | 13.5    |
| 29.3      | 6.5     | 28.7      | 17.7    | 27.9      | 12.7    |
| 31.2      | 2.4     | 29.5      | 9.2     | 28.4      | 8.5     |
| 32.5      | 14.7    | 31.0      | 11.9    | 28.8      | 7.7     |
| 34.3      | 16.1    | 31.8      | 9.4     | 30.8      | 13.9    |
| 35.5      | 16.3    | 33.9      | 11.0    | 33.5      | 5.4     |
| 36.4      | 3.4     | 34.7      | 8.6     | 34.1      | 4.0     |
| 37.4      | 10.7    | 36.2      | 9.7     | 34.6      | 5.7     |
| 38.8      | 7.1     | 37.1      | 7.8     | 35.7      | 4.1     |
| 40.3      | 5.3     | 37.7      | 8.7     | 36.8      | 3.1     |
| 41.3      | 1.3     | 38.8      | 8.4     | 37.4      | 2.6     |
| 42.1      | 4.5     | 40.8      | 13.4    | 38.7      | 2.6     |
| 43.5      | 4.3     | 42.1      | 6.0     | 39.6      | 8.2     |
| 46.0      | 6.3     | 43.3      | 6.3     | 40.9      | 5.4     |
| 47.0      | 5.0     | 44.2      | 4.4     | 41.4      | 7.0     |
|           |         | 45.7      | 7.4     | 42.8      | 2.3     |
|           |         | 47.5      | 6.9     | 45.5      | 5.7     |
|           |         | 48.7      | 6.3     | 49.2      | 4.2     |

## IV. Crystal Packing for 1-6

All six crystal structures determined were found to belong to a centrosymmetric space group (in fact they all belong to the triclinic space group  $P\bar{1}$ ), as is typical for chromophores with large dipole moments, ruling out bulk second-order nonlinear effects. Apart from **2**, all the chromophores presented in this paper have two molecules per unit cell, related by an inversion center. In all cases there are stacking interactions between the polyene-substituted cyclopentadienyl rings and the acceptor groups of adjacent molecules; for the SDS chromophores **4-6** it is the dicyanomethylidene portion of the acceptor that stacks with the donor. Depending on whether these stacked neighbors are those related by inversion or translation leads to the formation of either dimers (**4** and **6**) or chains (**1** and **5**), neighboring chains in the crystal showing antiparallel orientation. The dimer formed by **4** is shown in Figure S5; similar dimers in which the acceptor groups stack with the substituted cyclopentadienyl rings of adjacent molecules have previously been observed in other crystal structures of chromophores containing ferrocene donors linked to strong  $\pi$ -acceptors, including those of **IV**, **V** and **VII**.<sup>5</sup> Two antiparallel chains for chromophore **5** are shown in Figure S6. Crystals of **2** contain two crystallographically independent molecules (denoted **2A** and **2B**) in the asymmetric unit differing slightly in their conformations and consequently exhibits more complex packing (Figure S7). The conjugated polyene chains are coplanar and lie perpendicular to the *c* axis, with the polyene axes for **2A** molecules oriented at ca. 111 ° relative to those of the

---

5. Liao, Y.; Eichinger, B. E.; Firestone, K. A.; Haller, M.; Luo, J.; Kaminsky, W.; Benedict, J. B.; Reid, P. J.; Jen, A. K.-Y.; Dalton, L. R.; Robinson, B. H., *J. Am. Chem. Soc.* **2005**, *127*, 2759.

**2B** molecules. Pairs of **2A** molecules form antiparallel units with an intermolecular distance of 4.122 Å between the centroid of the polyene-substituted cyclopentadienyl ring of the donor and centroid of the TB heterocycle. Pairs of **2B** molecules also form similar antiparallel dimers. **2A-2B** interactions appear to be stronger than **2A-2A** and **2B-2B** interactions, with distances of 3.746 Å between the C<sub>5</sub>Me<sub>4</sub>H centroid of **2A** and the TB centroid of **2B** and 3.712 Å between the C<sub>5</sub>Me<sub>4</sub>H centroid of **2B** and the TB centroid of **2A**. Short contacts are present between one of the TB methyl C–H moieties of **2A** and one of the oxygen atoms of neighboring (1+x, –1+y, 1+z) **2B** and vice versa (H···O distances of 2.408 and 2.408 Å respectively, C–H···O angles of 170.7 and 174.5 °, respectively).

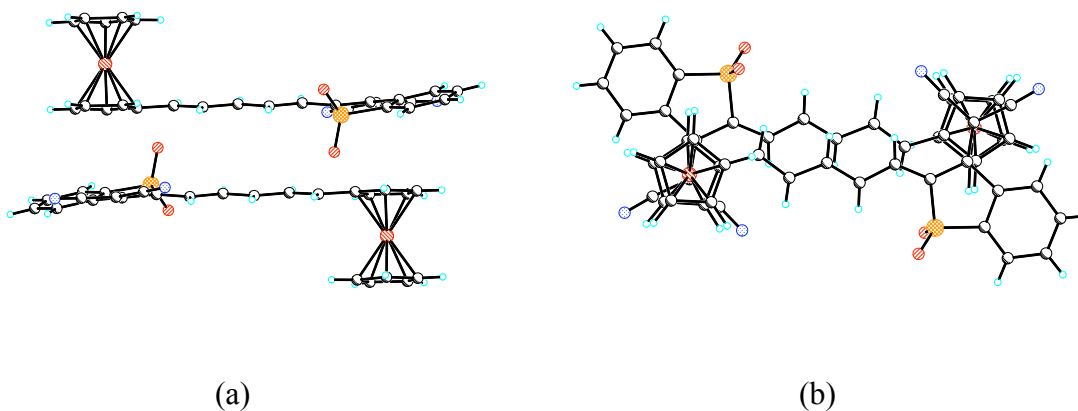

**Figure S5.** Two views of the stacking between donor and acceptor found in the crystal structure of **4** resulting in the formation of centrosymmetric dimers.

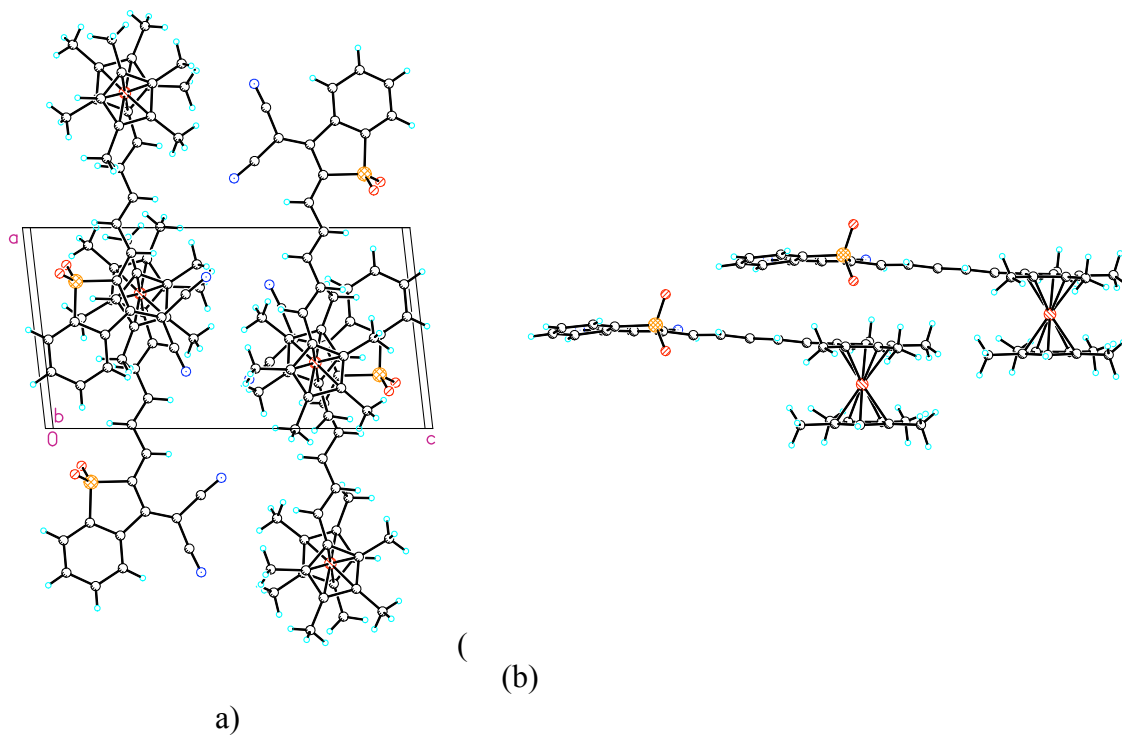

**Figure S6.** Crystal packing in the structure of **5** showing (a) the presence of antiparallel chains and (b) two molecules in one of the chains.

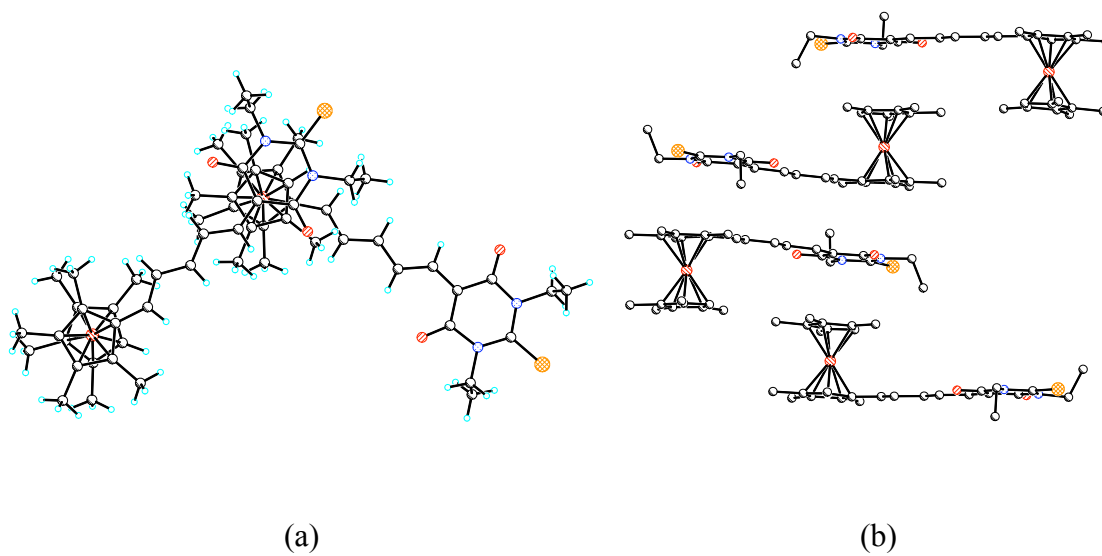

**Figure S7.** Crystal packing in the structure of **2** showing (a) a **2A** molecule (left) oriented at ca. 111° relative to a **2B** molecule (right) and (b) the stacking between a **2A** pair (center molecules) and two **2B** molecules (top and bottom molecules).

## V. NMR Data for 1-6 and IX

The following data were all acquired in CD<sub>2</sub>Cl<sub>2</sub> at 400.14 (<sup>1</sup>H) or 100.62 (<sup>13</sup>C) MHz.

**1.** <sup>1</sup>H NMR: δ 8.11 (d, *J* = 12.6 Hz, 1H, H<sub>ε</sub>), 8.00 (distorted t, apparent *J* = ca. 13 Hz, 1H, H<sub>δ</sub>), 7.26 (dd, *J* = 14.0 Hz, 11.5 Hz, 1H, H<sub>γ</sub>), 7.05 (d, *J* = 15.1 Hz, 1H, H<sub>α</sub>), 6.77 (dd, *J* = 15.0 Hz, 11.4 Hz, 1H, H<sub>β</sub>), 4.60 (apparent s, 2H, C<sub>5</sub>H<sub>4</sub>), 4.58 (apparent s, 2H, C<sub>5</sub>H<sub>4</sub>), 4.50 (m, 4H, Et CH<sub>2</sub> groups), 4.20 (s, 5H, C<sub>5</sub>H<sub>5</sub>), 1.26 (m, 6H, Et CH<sub>3</sub> groups). <sup>13</sup>C{<sup>1</sup>H} NMR: δ 179.42 (C=S), 161.11 (C=O), 160.17 (C=O), 158.38 (C<sub>ε</sub>), 157.05 (C<sub>γ</sub>), 148.10 (C<sub>α</sub>), 127.40 (C<sub>δ</sub>), 126.64 (C<sub>β</sub>), 113.05 (C<sub>A</sub>, i.e. =C(CO)<sub>2</sub>), 81.22 (Fc quat.), 72.53 (C<sub>5</sub>H<sub>4</sub> CH), 70.61 (C<sub>5</sub>H<sub>5</sub>), 69.25 (C<sub>5</sub>H<sub>4</sub> CH), 43.81 (Et CH<sub>2</sub>), 43.27 (Et CH<sub>2</sub>), 12.56 (Et CH<sub>3</sub>), 12.51 (Et CH<sub>3</sub>).

**2.** <sup>1</sup>H NMR: δ 8.12 (d, *J* = 12.8 Hz, 1H, H<sub>ε</sub>), 8.00 (distorted t, apparent *J* = ca. 13 Hz, 1H, H<sub>δ</sub>), 7.27 (dd, *J* = 13.5 Hz, 10.9 Hz, 1H, H<sub>γ</sub>), 6.86 (m, 2H, H<sub>β</sub> and H<sub>α</sub>), 4.51 (m, 4H, Et CH<sub>2</sub> groups), 3.58 (s, 1H, Fc" CH), 1.64 (s, 12H, overlapping Fc" CH<sub>3</sub> groups), 1.34 (s, 6H, Fc" CH<sub>3</sub>), 1.32 (s, 6H, Fc" CH<sub>3</sub>), 1.18 (m, 6H, Et CH<sub>3</sub> groups). <sup>13</sup>C{<sup>1</sup>H} NMR: δ 179.19 (C=S), 161.41 (C=O), 160.43 (C=O), 159.61 (C<sub>γ</sub>), 158.26 (C<sub>ε</sub>), 152.67 (C<sub>α</sub>), 125.64 (C<sub>δ</sub>), 125.20 (C<sub>β</sub>), 110.69 (C<sub>A</sub>, i.e. =C(CO)<sub>2</sub>), 89.50 (Fc" quat.), 84.60 (2 overlapping Fc" quat.), 83.71 (Fc" quat.), 78.70 (Fc" quat.), 74.19 (Fc" CH), 43.69 (Et CH<sub>2</sub>), 43.15 (Et CH<sub>2</sub>), 12.58 (Et CH<sub>3</sub>), 12.52 (Et CH<sub>3</sub>), 11.08 (Fc" CH<sub>3</sub>), 10.88 (Fc" CH<sub>3</sub>), 10.04 (Fc" CH<sub>3</sub>), 9.04 (Fc" CH<sub>3</sub>).

3.  $^1\text{H}$  NMR:  $\delta$  8.06 (d,  $J = 12.7$  Hz, 1H,  $\text{H}_\epsilon$ ), 7.93 (m, 1H,  $\text{H}_\delta$ ), 7.20 (dd,  $J = 14.0$  Hz, 11.7 Hz, 1H,  $\text{H}_\gamma$ ), 6.94 (d,  $J = 15.1$  Hz, 1H,  $\text{H}_\alpha$ ), 6.71 (dd,  $J = 15.1$  Hz, 11.4 Hz, 1H,  $\text{H}_\beta$ ), 4.93 (apparent s, 2H,  $\text{C}_5\text{H}_4$ ), 4.78 (apparent s, 2H,  $\text{C}_5\text{H}_4$ ), 4.55 (s, 5H,  $\text{C}_5\text{H}_5$ ), 4.47 (m, 4H, Et  $\text{CH}_2$  groups), 1.26 (m, 6H, Et  $\text{CH}_3$ ).  $^{13}\text{C}\{^1\text{H}\}$  NMR:  $\delta$  179.40 (C=S), 161.04 (C=O), 160.07 (C=O), 158.34 ( $\text{C}_\epsilon$ ), 157.77 ( $\text{C}_\gamma$ ), 145.97 ( $\text{C}_\alpha$ ), 127.45 ( $\text{C}_\delta$ ), 125.94 ( $\text{C}_\beta$ ), 113.17 ( $\text{C}_A$ , i.e. =C(CO) $_2$ ), 85.39 (Rc quat.), 73.24 ( $\text{C}_5\text{H}_4$  CH), 72.29 ( $\text{C}_5\text{H}_5$ ), 70.74 ( $\text{C}_5\text{H}_4$  CH), 43.80 (Et  $\text{CH}_2$ ), 43.26 (Et  $\text{CH}_2$ ), 12.54 (Et  $\text{CH}_3$ ), 12.49 (Et  $\text{CH}_3$ ).

4.  $^1\text{H}$  NMR:  $\delta$  8.84 (d,  $J = 7.43$  Hz, 1H, A CH), 8.50 (d,  $J = 11.4$  Hz, 1H,  $\text{H}_\epsilon$ ), 7.95 (m, 1H, A CH), 7.85 (m, 2H, A CH), 7.25 (m, 2H,  $\text{H}_\delta$  and  $\text{H}_\gamma$ ), 7.14 (d,  $J = 15.0$  Hz, 1H,  $\text{H}_\alpha$ ), 6.78 (dd,  $J = 14.9, 10.9$  Hz, 1H,  $\text{H}_\beta$ ), 4.66 (m, 2H,  $\text{C}_5\text{H}_4$ ), 4.63 (m, 2H,  $\text{C}_5\text{H}_4$ ), 4.22 (s, 5H,  $\text{C}_5\text{H}_5$ ).  $^{13}\text{C}\{^1\text{H}\}$  NMR:  $\delta$  154.76, 150.27, 149.85, 144.21, 139.02, 135.38, 134.88, 129.39, 127.96, 126.32, 126.23, 123.32, 122.18, 115.44 (CN), 115.33 (CN), 81.23 (Fc quat.), 73.34 ( $\text{C}_5\text{H}_4$  CH), 70.91 ( $\text{C}_5\text{H}_5$ ), 69.68 ( $\text{C}_5\text{H}_4$  CH) ( $\text{C}(\text{CN})_2$  resonance not observed); a satisfactory HSQC spectrum was not obtained for this compound.

5.  $^1\text{H}$  NMR:  $\delta$  8.85 (d,  $J = 7.6$  Hz, 1H, A CH), 8.64 (d,  $J = 12.7$  Hz, 1H,  $\text{H}_\epsilon$ ), 7.91 (d,  $J =$  ca. 7.7 Hz, 1H, A CH), 7.81 (m, 2H, A CH), 7.37 (t,  $J = 12.4$  Hz, 1H,  $\text{H}_\gamma$ ), 7.17 (m, 2H,  $\text{H}_\delta$  and  $\text{H}_\alpha$ ), 6.87 (dd,  $J = 14.5, 11.8$  Hz, 1H,  $\text{H}_\beta$ ), 3.45 (s, 1H,  $\text{C}_5\text{Me}_4\text{H}$ ), 1.81 (s, 6H, Fc"  $\text{CH}_3$ ), 1.78 (s, 6H, Fc"  $\text{CH}_3$ ), 1.47 (s, 12H, overlapping Fc"  $\text{CH}_3$  groups).  $^{13}\text{C}\{^1\text{H}\}$  NMR:  $\delta$  155.98 ( $\text{C}_\gamma$ ), 154.90 ( $\text{C}_\alpha$ ), 148.25 (A quat.), 142.74 ( $\text{C}_\epsilon$ ), 138.71 (A quat.), 134.69 (A CH), 134.39 (A CH), 130.07 (A quat.), 126.02 ( $\text{C}_\beta$ ), 125.85 (A CH), 124.55 (A quat.), 122.44 ( $\text{C}_\delta$ ), 121.92 (A CH), 116.93 (CN), 116.80 (CN), 90.84 (Fc" quat.), 84.79 (2 overlapping Fc" quat.), 83.88 (Fc" quat.), 79.78 (Fc" quat.), 74.25 (Fc" CH), 64.69 ( $\text{C}(\text{CN})_2$ ), 11.21 (Fc"  $\text{CH}_3$ ), 11.04 (Fc"  $\text{CH}_3$ ), 10.30 (Fc"  $\text{CH}_3$ ), 9.23 (Fc"  $\text{CH}_3$ ).



6.  $^1\text{H}$  NMR:  $\delta$  8.83 (d,  $J=7.4$  Hz, 1H, A CH), 8.44 (d,  $J=11.6$  Hz, 1H,  $\text{H}_\epsilon$ ), 7.94 (m, 1H, A CH), 7.85 (m, 2H, A CH), 7.20 (m, 2H,  $\text{H}_\delta$  and  $\text{H}_\gamma$ ), 7.02 (d,  $J=15.0$  Hz, 1H,  $\text{H}_\alpha$ ), 6.75 (dd,  $J=15.0$  Hz, 10.8 Hz, 1H,  $\text{H}_\beta$ ), 4.97 (apparent t,  $J=1.7$  Hz, 2H,  $\text{C}_5\text{H}_4$ ), 4.83 (apparent t, 2H,  $\text{C}_5\text{H}_4$ ), 4.59 (s, 5H,  $\text{C}_5\text{H}_5$ ).  $^{13}\text{C}\{^1\text{H}\}$  NMR:  $\delta$  155.14 ( $\text{C}_\gamma$ ), 149.94 (A quat.), 147.94 ( $\text{C}_\alpha$ ), 144.25 ( $\text{C}_\epsilon$ ), 139.03 (A quat.), 135.45 (A CH), 134.87 (A CH), 129.32 (A quat.), 128.16 (A quat.), 126.24 (A CH), 125.54 ( $\text{C}_\beta$ ), 123.34 ( $\text{C}_\delta$ ), 122.18 (A CH), 115.27 (CN), 115.15 (CN), 85.38 (Rc quat.), 73.79 ( $\text{C}_5\text{H}_4$  CH), 72.57 ( $\text{C}_5\text{H}_5$ ), 71.03 ( $\text{C}_5\text{H}_4$  CH) ( $\text{C}(\text{CN})_2$  resonance not observed).

IX.  $^1\text{H}$  NMR:  $\delta$  8.81 (d,  $J=7.2$  Hz, 1H, A CH), 8.49 (d,  $J=12.5$  Hz, 1H,  $\text{H}_\epsilon$ ), 7.93 (poorly resolved dd,  $J=8.6, 1.8$  Hz, 1H, A CH), 7.81 (m, 2H, A CH), 7.45 (d,  $J=8.9$  Hz, 2H, D CH), 7.36 (dd,  $J=13.4, 11.2$  Hz, 1H,  $\text{H}_\gamma$ ), 7.24 (t, apparent  $J=13.0$  Hz, 1H,  $\text{H}_\delta$ ), 7.15 (d,  $J=14.7$  Hz, 1H,  $\text{H}_\alpha$ ), 7.05 (dd,  $J=14.7, 11.1$  Hz, 1H,  $\text{H}_\beta$ ), 6.65 (d,  $J=9.0$  Hz, 2H, D CH), 3.37 (t,  $J=7.8$  Hz, 4H,  $\text{NCH}_2$ ), 1.61 (m, 4H,  $\text{NCH}_2\text{CH}_2$ ), 1.39 (m, 4H,  $\text{CH}_2\text{CH}_3$ ), 0.97 (t,  $J=7.3$  Hz,  $\text{CH}_3$ ).  $^{13}\text{C}\{^1\text{H}\}$  NMR:  $\delta$  157.11 ( $\text{C}_\gamma$ ), 151.61 (quat.), 149.98 ( $\text{C}_\alpha$ ), 148.97 (quat.), 143.91 ( $\text{C}_\epsilon$ ), 138.96 (quat.), 134.82 (A CH), 134.61 (A CH), 132.02 (D CH), 129.71 (quat.), 126.07 (A CH), 125.68 (quat.), 123.63 ( $\text{C}_\beta$ ), 123.18 ( $\text{C}_\delta$ ), 121.90 (A CH), 115.99 (CN), 115.91 (CN), 112.38 (D CH), 67.21 ( $\text{C}(\text{CN})_2$ ), 51.31 ( $\text{NCH}_2$ ), 29.80 ( $\text{NCH}_2\text{CH}_2$ ), 20.58 ( $\text{CH}_2\text{CH}_3$ ), 14.04 ( $\text{CH}_3$ ) (1 quat. resonance not observed).

**Ferrocene.**  $^1\text{H}$  NMR:  $\delta$  4.18.  $^{13}\text{C}\{^1\text{H}\}$  NMR:  $\delta$  68.41.

**Ruthenocene.**  $^1\text{H}$  NMR:  $\delta$  4.54.  $^{13}\text{C}\{^1\text{H}\}$  NMR:  $\delta$  70.26.

## VI. Calculated Atomic Charge Density Data

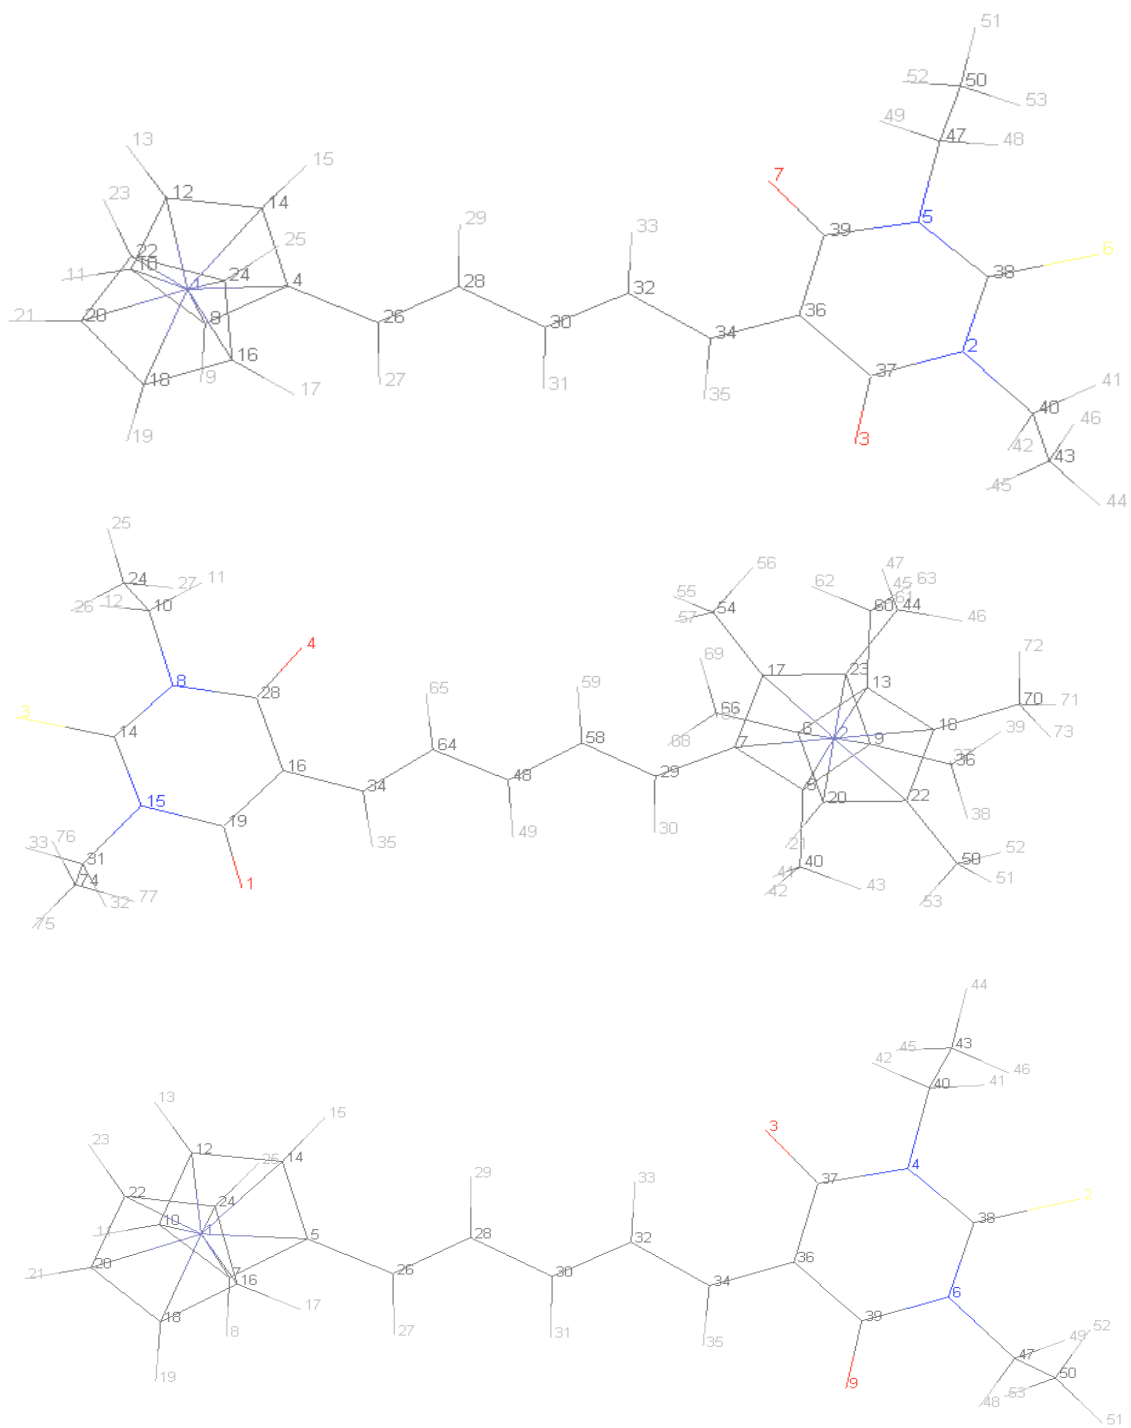

**Figure S8.** Atom Labels used for TB Chromophores, **1** (top), **2** (center) and **3** (bottom).

**Table S4. Charge Density Data for TB Chromophores.**

| 1    |    |           | 2    |    |           | 3    |    |           |
|------|----|-----------|------|----|-----------|------|----|-----------|
| Atom |    | Charge    | Atom |    | Charge    | Atom |    | Charge    |
| 1    | Fe | 0.576955  | 1    | O  | -0.520887 | 1    | Ru | 0.054916  |
| 2    | N  | -0.528196 | 2    | Fe | 0.624175  | 2    | S  | -0.246683 |
| 3    | O  | -0.516079 | 3    | S  | -0.242029 | 3    | O  | -0.48808  |
| 4    | C  | -0.013906 | 4    | O  | -0.526904 | 4    | N  | -0.461639 |
| 5    | N  | -0.519864 | 5    | C  | -0.020676 | 5    | C  | 0.046408  |
| 6    | S  | -0.240324 | 6    | C  | 0.03496   | 6    | N  | -0.460068 |
| 7    | O  | -0.516494 | 7    | C  | -0.018797 | 7    | C  | -0.189793 |
| 8    | C  | -0.216854 | 8    | N  | -0.509618 | 8    | H  | 0.157499  |
| 9    | H  | 0.138016  | 9    | C  | 0.013008  | 9    | O  | -0.481992 |
| 10   | C  | -0.18191  | 10   | C  | -0.142706 | 10   | C  | -0.143619 |
| 11   | H  | 0.140898  | 11   | H  | 0.178846  | 11   | H  | 0.161037  |
| 12   | C  | -0.183219 | 12   | H  | 0.189708  | 12   | C  | -0.146446 |
| 13   | H  | 0.141484  | 13   | C  | 0.005421  | 13   | H  | 0.162136  |
| 14   | C  | -0.221543 | 14   | C  | 0.337677  | 14   | C  | -0.183405 |
| 15   | H  | 0.140999  | 15   | N  | -0.509985 | 15   | H  | 0.158725  |
| 16   | C  | -0.184643 | 16   | C  | -0.025805 | 16   | C  | -0.154122 |
| 17   | H  | 0.14022   | 17   | C  | -0.016326 | 17   | H  | 0.165505  |
| 18   | C  | -0.18666  | 18   | C  | -0.004548 | 18   | C  | -0.156282 |
| 19   | H  | 0.14062   | 19   | C  | 0.595508  | 19   | H  | 0.160468  |
| 20   | C  | -0.187973 | 20   | C  | -0.270877 | 20   | C  | -0.148235 |
| 21   | H  | 0.141239  | 21   | H  | 0.140478  | 21   | H  | 0.161603  |
| 22   | C  | -0.187689 | 22   | C  | 0.042389  | 22   | C  | -0.150028 |
| 23   | H  | 0.141372  | 23   | C  | 0.007683  | 23   | H  | 0.161697  |
| 24   | C  | -0.19064  | 24   | C  | -0.448806 | 24   | C  | -0.153315 |
| 25   | H  | 0.143163  | 25   | H  | 0.14747   | 25   | H  | 0.163227  |
| 26   | C  | -0.089858 | 26   | H  | 0.171734  | 26   | C  | -0.134272 |
| 27   | H  | 0.118312  | 27   | H  | 0.163242  | 27   | H  | 0.145673  |
| 28   | C  | -0.102795 | 28   | C  | 0.606473  | 28   | C  | -0.118886 |
| 29   | H  | 0.117799  | 29   | C  | -0.155346 | 29   | H  | 0.143652  |
| 30   | C  | -0.064854 | 30   | H  | 0.133609  | 30   | C  | -0.09525  |
| 31   | H  | 0.11691   | 31   | C  | -0.143548 | 31   | H  | 0.142688  |
| 32   | C  | -0.098498 | 32   | H  | 0.180509  | 32   | C  | -0.129893 |
| 33   | H  | 0.150864  | 33   | H  | 0.189431  | 33   | H  | 0.189398  |
| 34   | C  | -0.128348 | 34   | C  | -0.177463 | 34   | C  | -0.172668 |
| 35   | H  | 0.139791  | 35   | H  | 0.175472  | 35   | H  | 0.177977  |
| 36   | C  | -0.031618 | 36   | C  | -0.534259 | 36   | C  | -0.02428  |
| 37   | C  | 0.598022  | 37   | H  | 0.167106  | 37   | C  | 0.539124  |
| 38   | C  | 0.339806  | 38   | H  | 0.159947  | 38   | C  | 0.29177   |
| 39   | C  | 0.595961  | 39   | H  | 0.160412  | 39   | C  | 0.523888  |
| 40   | C  | -0.140517 | 40   | C  | -0.530793 | 40   | C  | -0.141416 |
| 41   | H  | 0.192095  | 41   | H  | 0.168431  | 41   | H  | 0.190937  |
| 42   | H  | 0.181033  | 42   | H  | 0.162703  | 42   | H  | 0.181497  |
| 43   | C  | -0.460716 | 43   | H  | 0.161569  | 43   | C  | -0.450469 |
| 44   | H  | 0.158186  | 44   | C  | -0.532992 | 44   | H  | 0.149225  |
| 45   | H  | 0.172396  | 45   | H  | 0.166768  | 45   | H  | 0.162664  |
| 46   | H  | 0.183171  | 46   | H  | 0.159527  | 46   | H  | 0.173054  |
| 47   | C  | -0.139106 | 47   | H  | 0.16165   | 47   | C  | -0.142255 |

|    |   |           |    |   |           |    |   |           |
|----|---|-----------|----|---|-----------|----|---|-----------|
| 48 | H | 0.192949  | 48 | C | -0.095365 | 48 | H | 0.182854  |
| 49 | H | 0.177121  | 49 | H | 0.139105  | 49 | H | 0.190468  |
| 50 | C | -0.460018 | 50 | C | -0.528763 | 50 | C | -0.450798 |
| 51 | H | 0.157643  | 51 | H | 0.166413  | 51 | H | 0.149655  |
| 52 | H | 0.174829  | 52 | H | 0.15809   | 52 | H | 0.172483  |
| 53 | H | 0.180469  | 53 | H | 0.161695  | 53 | H | 0.163663  |
|    |   |           | 54 | C | -0.541864 |    |   |           |
|    |   |           | 55 | H | 0.168563  |    |   |           |
|    |   |           | 56 | H | 0.157806  |    |   |           |
|    |   |           | 57 | H | 0.171743  |    |   |           |
|    |   |           | 58 | C | -0.130034 |    |   |           |
|    |   |           | 59 | H | 0.143637  |    |   |           |
|    |   |           | 60 | C | -0.529785 |    |   |           |
|    |   |           | 61 | H | 0.165806  |    |   |           |
|    |   |           | 62 | H | 0.160385  |    |   |           |
|    |   |           | 63 | H | 0.157449  |    |   |           |
|    |   |           | 64 | C | -0.134346 |    |   |           |
|    |   |           | 65 | H | 0.185993  |    |   |           |
|    |   |           | 66 | C | -0.530274 |    |   |           |
|    |   |           | 67 | H | 0.165567  |    |   |           |
|    |   |           | 68 | H | 0.172874  |    |   |           |
|    |   |           | 69 | H | 0.156782  |    |   |           |
|    |   |           | 70 | C | -0.529041 |    |   |           |
|    |   |           | 71 | H | 0.164835  |    |   |           |
|    |   |           | 72 | H | 0.158154  |    |   |           |
|    |   |           | 73 | H | 0.15723   |    |   |           |
|    |   |           | 74 | C | -0.449061 |    |   |           |
|    |   |           | 75 | H | 0.148011  |    |   |           |
|    |   |           | 76 | H | 0.17105   |    |   |           |
|    |   |           | 77 | H | 0.163804  |    |   |           |

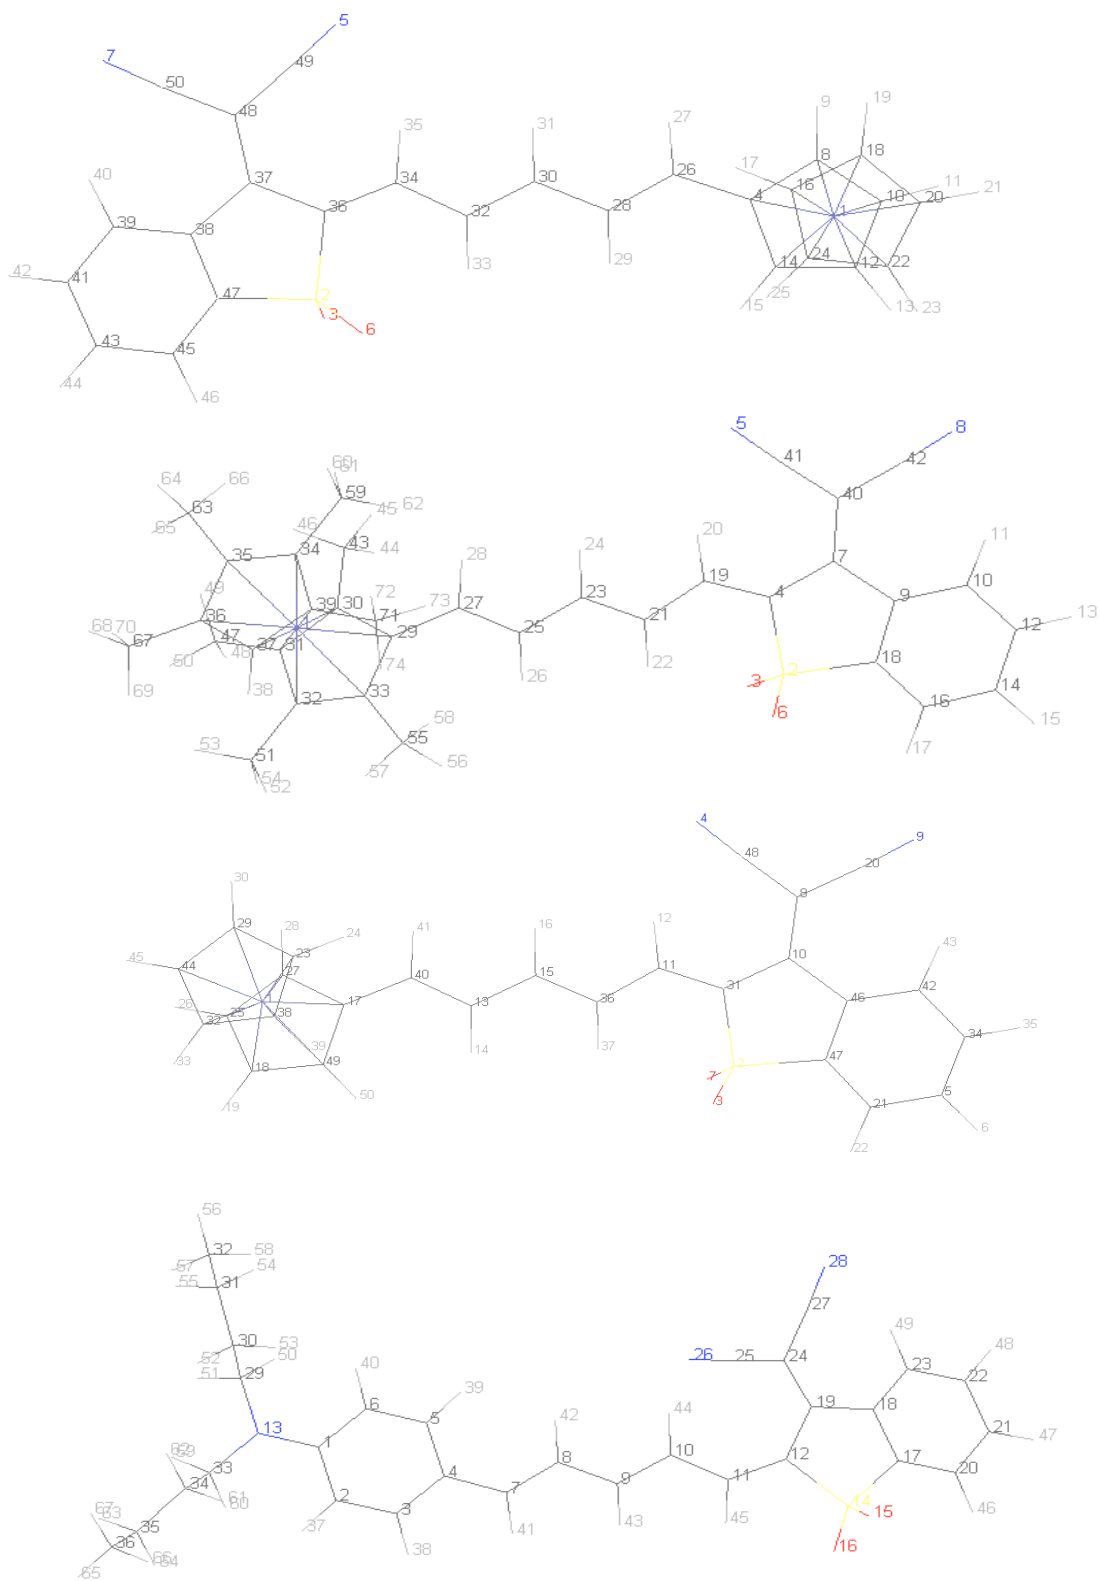

**Figure S9.** Atom Labels used for SDS Chromophores: from top-to-bottom, 4, 5, 6, and IX.

**Table S5. Charge Density Data for SDS Chromophores.**

| 4    |    |           | 5    |    |           | 6    |    |           | 6    |   |           |
|------|----|-----------|------|----|-----------|------|----|-----------|------|---|-----------|
| Atom |    | Charge    | Atom |    | Charge    | Atom |    | Charge    | Atom |   | Charge    |
| 1    | Fe | 0.572429  | 1    | Fe | 0.643693  | 1    | Ru | 0.055587  | 1    | C | 0.518537  |
| 2    | S  | 1.141851  | 2    | S  | 1.132365  | 2    | S  | 1.138099  | 2    | C | -0.225286 |
| 3    | O  | -0.496236 | 3    | O  | -0.563559 | 3    | O  | -0.564287 | 3    | C | -0.214213 |
| 4    | C  | -0.001162 | 4    | C  | -0.309827 | 4    | N  | -0.338369 | 4    | C | 0.25906   |
| 5    | N  | -0.499434 | 5    | N  | -0.5143   | 5    | C  | -0.112041 | 5    | C | -0.323579 |
| 6    | O  | -0.51658  | 6    | O  | -0.541002 | 6    | H  | 0.158185  | 6    | C | -0.212152 |
| 7    | N  | -0.489439 | 7    | C  | 0.200472  | 7    | O  | -0.535316 | 7    | C | -0.233989 |
| 8    | C  | -0.23052  | 8    | N  | -0.512244 | 8    | C  | 0.028964  | 8    | C | -0.12373  |
| 9    | H  | 0.146209  | 9    | C  | 0.104373  | 9    | N  | -0.33497  | 9    | C | -0.16003  |
| 10   | C  | -0.180879 | 10   | C  | -0.176591 | 10   | C  | 0.197179  | 10   | C | -0.137399 |
| 11   | H  | 0.148669  | 11   | H  | 0.194354  | 11   | C  | -0.118045 | 11   | C | -0.174329 |
| 12   | C  | -0.186208 | 12   | C  | -0.133764 | 12   | H  | 0.195397  | 12   | C | -0.183933 |
| 13   | H  | 0.148844  | 13   | H  | 0.158224  | 13   | C  | -0.119578 | 13   | N | -0.554041 |
| 14   | C  | -0.229574 | 14   | C  | -0.114084 | 14   | H  | 0.150732  | 14   | S | 1.042773  |
| 15   | H  | 0.146351  | 15   | H  | 0.157578  | 15   | C  | -0.103676 | 15   | O | -0.498831 |
| 16   | C  | -0.180695 | 16   | C  | -0.161915 | 16   | H  | 0.152977  | 16   | O | -0.489679 |
| 17   | H  | 0.149147  | 17   | H  | 0.185894  | 17   | C  | 0.042975  | 17   | C | -0.166651 |
| 18   | C  | -0.195216 | 18   | C  | -0.190291 | 18   | C  | -0.144807 | 18   | C | 0.183305  |
| 19   | H  | 0.146567  | 19   | C  | -0.123455 | 19   | H  | 0.163925  | 19   | C | -0.031466 |
| 20   | C  | -0.188755 | 20   | H  | 0.197956  | 20   | C  | 0.149455  | 20   | C | -0.209124 |
| 21   | H  | 0.146835  | 21   | C  | -0.152465 | 21   | C  | -0.154072 | 21   | C | -0.083392 |
| 22   | C  | -0.189797 | 22   | H  | 0.198606  | 22   | H  | 0.185809  | 22   | C | -0.186673 |
| 23   | H  | 0.146858  | 23   | C  | -0.105488 | 23   | C  | -0.153064 | 23   | C | -0.114954 |
| 24   | C  | -0.192336 | 24   | H  | 0.151003  | 24   | H  | 0.169065  | 24   | C | 0.252834  |
| 25   | H  | 0.149219  | 25   | C  | -0.132167 | 25   | C  | -0.141883 | 25   | C | 0.149025  |
| 26   | C  | -0.096941 | 26   | H  | 0.152184  | 26   | H  | 0.162518  | 26   | N | -0.451338 |
| 27   | H  | 0.12953   | 27   | C  | -0.160752 | 27   | C  | -0.190011 | 27   | C | 0.197624  |
| 28   | C  | -0.095187 | 28   | H  | 0.138855  | 28   | H  | 0.159532  | 28   | N | -0.530068 |
| 29   | H  | 0.123743  | 29   | C  | -0.013528 | 29   | C  | -0.15552  | 29   | C | -0.115745 |
| 30   | C  | -0.090816 | 30   | C  | -0.031534 | 30   | H  | 0.162309  | 30   | C | -0.307774 |
| 31   | H  | 0.134434  | 31   | C  | 0.017804  | 31   | C  | -0.305727 | 31   | C | -0.26318  |
| 32   | C  | -0.111641 | 32   | C  | 0.010611  | 32   | C  | -0.149216 | 32   | C | -0.439096 |
| 33   | H  | 0.1598    | 33   | C  | -0.018439 | 33   | H  | 0.163154  | 33   | C | -0.127103 |
| 34   | C  | -0.110285 | 34   | C  | -0.00412  | 34   | C  | -0.131359 | 34   | C | -0.279332 |
| 35   | H  | 0.160965  | 35   | C  | 0.010196  | 35   | H  | 0.158626  | 35   | C | -0.252461 |
| 36   | C  | -0.295979 | 36   | C  | 0.024635  | 36   | C  | -0.150048 | 36   | C | -0.431561 |
| 37   | C  | 0.166489  | 37   | C  | -0.26327  | 37   | H  | 0.197791  | 37   | H | 0.126697  |
| 38   | C  | 0.09054   | 38   | H  | 0.142162  | 38   | C  | -0.152384 | 38   | H | 0.122082  |
| 39   | C  | -0.127108 | 39   | C  | 0.035173  | 39   | H  | 0.166883  | 39   | H | 0.126199  |
| 40   | H  | 0.150611  | 40   | C  | 0.050384  | 40   | C  | -0.130991 | 40   | H | 0.156932  |
| 41   | C  | -0.110948 | 41   | C  | 0.310958  | 41   | H  | 0.150332  | 41   | H | 0.122604  |
| 42   | H  | 0.133638  | 42   | C  | 0.307862  | 42   | C  | -0.173486 | 42   | H | 0.223518  |
| 43   | C  | -0.076072 | 43   | C  | -0.534305 | 43   | H  | 0.191416  | 43   | H | 0.095379  |
| 44   | H  | 0.131586  | 44   | H  | 0.171797  | 44   | C  | -0.147474 | 44   | H | 0.305756  |
| 45   | C  | -0.133095 | 45   | H  | 0.163042  | 45   | H  | 0.162787  | 45   | H | 0.16717   |
| 46   | H  | 0.149466  | 46   | H  | 0.161992  | 46   | C  | 0.109324  | 46   | H | 0.174589  |
| 47   | C  | -0.198403 | 47   | C  | -0.535277 | 47   | C  | -0.19806  | 47   | H | 0.148363  |
| 48   | C  | 0.038407  | 48   | H  | 0.16987   | 48   | C  | 0.152145  | 48   | H | 0.148858  |
| 49   | C  | 0.306919  | 49   | H  | 0.161796  | 49   | C  | -0.183012 | 49   | H | 0.228932  |

|    |   |          |    |   |           |    |   |          |    |   |          |
|----|---|----------|----|---|-----------|----|---|----------|----|---|----------|
| 50 | C | 0.304198 | 50 | H | 0.161284  | 50 | H | 0.162229 | 50 | H | 0.158239 |
|    |   |          | 51 | C | -0.532119 |    |   |          | 51 | H | 0.15829  |
|    |   |          | 52 | H | 0.168948  |    |   |          | 52 | H | 0.224251 |
|    |   |          | 53 | H | 0.161445  |    |   |          | 53 | H | 0.224277 |
|    |   |          | 54 | H | 0.165631  |    |   |          | 54 | H | 0.130515 |
|    |   |          | 55 | C | -0.541766 |    |   |          | 55 | H | 0.130556 |
|    |   |          | 56 | H | 0.172665  |    |   |          | 56 | H | 0.153718 |
|    |   |          | 57 | H | 0.159582  |    |   |          | 57 | H | 0.14445  |
|    |   |          | 58 | H | 0.177167  |    |   |          | 58 | H | 0.14441  |
|    |   |          | 59 | C | -0.529554 |    |   |          | 59 | H | 0.155239 |
|    |   |          | 60 | H | 0.167934  |    |   |          | 60 | H | 0.155287 |
|    |   |          | 61 | H | 0.157707  |    |   |          | 61 | H | 0.142893 |
|    |   |          | 62 | H | 0.164027  |    |   |          | 62 | H | 0.142909 |
|    |   |          | 63 | C | -0.53     |    |   |          | 63 | H | 0.137622 |
|    |   |          | 64 | H | 0.167704  |    |   |          | 64 | H | 0.137655 |
|    |   |          | 65 | H | 0.158622  |    |   |          | 65 | H | 0.146968 |
|    |   |          | 66 | H | 0.160153  |    |   |          | 66 | H | 0.141793 |
|    |   |          | 67 | C | -0.529145 |    |   |          | 67 | H | 0.1418   |
|    |   |          | 68 | H | 0.167592  |    |   |          |    |   |          |
|    |   |          | 69 | H | 0.162069  |    |   |          |    |   |          |
|    |   |          | 70 | H | 0.157878  |    |   |          |    |   |          |
|    |   |          | 71 | C | -0.53188  |    |   |          |    |   |          |
|    |   |          | 72 | H | 0.167022  |    |   |          |    |   |          |
|    |   |          | 73 | H | 0.172634  |    |   |          |    |   |          |
|    |   |          | 74 | H | 0.162935  |    |   |          |    |   |          |
